# Supplementary material for: Exploitation of Sugarcane Bagasse and Environmentally Sustainable Production, Purification, Characterization, and Application of Lovastatin by Aspergillus terreus AUMC 15760 under Solid-State Conditions
Source: MDPI journal article supplement (doi:10.3390/molecules28104048), 2023-05-12
Supplement: s1 [file s1]

Supplementary Material

# Exploitation of Sugarcane Bagasse and Environmentally Sustainable Production, Purification, Characterization, and Application of Lovastatin by *Aspergillus terreus* AUMC 15760 under Solid-State Conditions

Ahmed M. A. A. Ramadan <sup>1</sup>, Reda M. Shehata <sup>1,2</sup>, Hussein H. EL-Sheikh <sup>1,2</sup>, Fuad Ameen <sup>3,\*</sup>, Steven L. Stephenson <sup>4</sup>, Sabry A. H. Zidan <sup>5</sup> and Osama A. M. Al-Bedak <sup>6,\*</sup>

<sup>1</sup> Department of Botany & Microbiology, Faculty of Science, Al Azhar University, Cairo 11511, Egypt; micro\_boy95@yahoo.com (A.M.A.A.R.); redamostafa.18@azhar.edu.eg (R.M.S.); husseinhosny.221@azhar.edu.eg (H.H.E.-S.)

<sup>2</sup> The Regional Center for Mycology and Biotechnology (RCMB), Al Azhar University, Cairo 11511, Egypt

<sup>3</sup> Department of Botany & Microbiology, College of Science, King Saud University, Riyadh 11451, Saudi Arabia

<sup>4</sup> Department of Biological Sciences, University of Arkansas, Fayetteville, AR 72701, USA; slsteph@uark.edu

<sup>5</sup> Department of Pharmacognosy, Faculty of Pharmacy, Al-Azhar University, Assiut Branch, Assiut 71524, Egypt

<sup>6</sup> Assiut University Mycological Centre, Assiut 71511, Egypt

\* Correspondence: fuadameen@ksu.edu.sa (F.A.); osamaalbedak@science.au.edu.eg (O.A.M.A.-B.)

**Table S1.** GC–MS spectral analysis of the chemical compounds detected in the methanol extract of *A. terreus* AUMC 15760.

| No. | Retention time (min) | Name of the compound                 | Molecular Weight | Molecular Formula                                |
|-----|----------------------|--------------------------------------|------------------|--------------------------------------------------|
| 1   | 10.844               | (2Z)-3-Methyl-2-decene               | 154              | C <sub>11</sub> H <sub>22</sub>                  |
| 2   | 12.018               | (Z,Z)-9,12-Octadecadienoic acid      | 280              | C <sub>18</sub> H <sub>32</sub> O <sub>2</sub>   |
| 3   | 11.569               | 2-Methoxyphenazine                   | 210              | C <sub>13</sub> H <sub>10</sub> N <sub>2</sub> O |
| 4   | 20.835               | 4,5,6,7-Tetramethyl-1H-benzimidazole | 174              | C <sub>11</sub> H <sub>14</sub> N <sub>2</sub>   |
| 5   | 9.442                | DL-Arabinitol                        | 152              | C <sub>5</sub> H <sub>12</sub> O <sub>5</sub>    |
| 6   | 21.672               | <b>Lovastatin</b>                    | <b>404</b>       | <b>C<sub>24</sub>H<sub>36</sub>O<sub>5</sub></b> |
| 7   | 11.299               | Palmitic acid                        | 256              | C <sub>16</sub> H <sub>32</sub> O <sub>2</sub>   |
| 8   | 28.669               | <b>Simvastatin</b>                   | <b>418</b>       | <b>C<sub>25</sub>H<sub>38</sub>O<sub>5</sub></b> |

|    |        |          |     |                |
|----|--------|----------|-----|----------------|
| 9  | 10.985 | Sorbitol | 182 | $C_6H_{14}O_6$ |
| 10 | 9.706  | Xylitol  | 152 | $C_5H_{12}O_5$ |

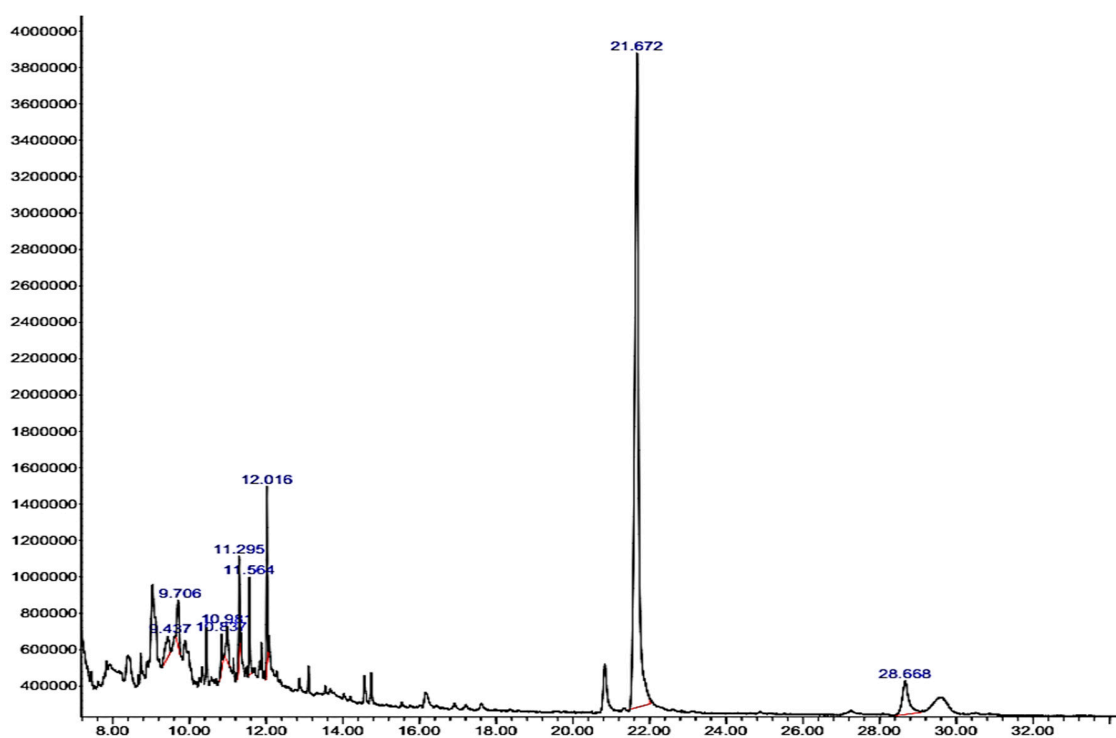

**Figure S1.** GC-MS chromatogram of the of methanol extract of *A. terreus* AUMC 15760.

**Table S2.** GC–MS spectral analysis of the chemical compounds detected in the methanol extract of *A. terreus* AUMC 15762.

| No. | Retention time (min) | Name of the compound                          | Molecular Weight | Molecular Formula                                |
|-----|----------------------|-----------------------------------------------|------------------|--------------------------------------------------|
| 1   | 10.444               | 4-((1E)-3-Hydroxy-1-propenyl)-2-methoxyphenol | 180              | C <sub>10</sub> H <sub>12</sub> O <sub>3</sub>   |
| 2   | 11.569               | 4-Nitro-2,6-dimethylphenol                    | 167              | C <sub>8</sub> H <sub>9</sub> NO <sub>3</sub>    |
| 3   | 12.024               | cis, cis-Linoleic acid                        | 266              | C <sub>17</sub> H <sub>30</sub> O <sub>2</sub>   |
| 4   | 9.436                | Deoxyribose                                   | 134              | C <sub>5</sub> H <sub>10</sub> O <sub>4</sub>    |
| 5   | 9.116                | Mono trimethylsilyl acrylic acid              | 144              | C <sub>6</sub> H <sub>12</sub> O <sub>2</sub> Si |
| 6   | <b>21.673</b>        | <b>Lovastatin</b>                             | <b>404</b>       | <b>C<sub>24</sub>H<sub>36</sub>O<sub>5</sub></b> |
| 7   | 8.403                | N-Ethyl-2-carbomethoxyazetidine               | 143              | C <sub>7</sub> H <sub>13</sub> NO <sub>2</sub>   |
| 8   | 9.608                | Ribitol                                       | 152              | C <sub>5</sub> H <sub>12</sub> O <sub>5</sub>    |
| 9   | 11.665               | Sorbitol                                      | 182              | C <sub>6</sub> H <sub>14</sub> O <sub>6</sub>    |
| 10  | 9.025                | Xylitol                                       | 152              | C <sub>5</sub> H <sub>12</sub> O <sub>5</sub>    |

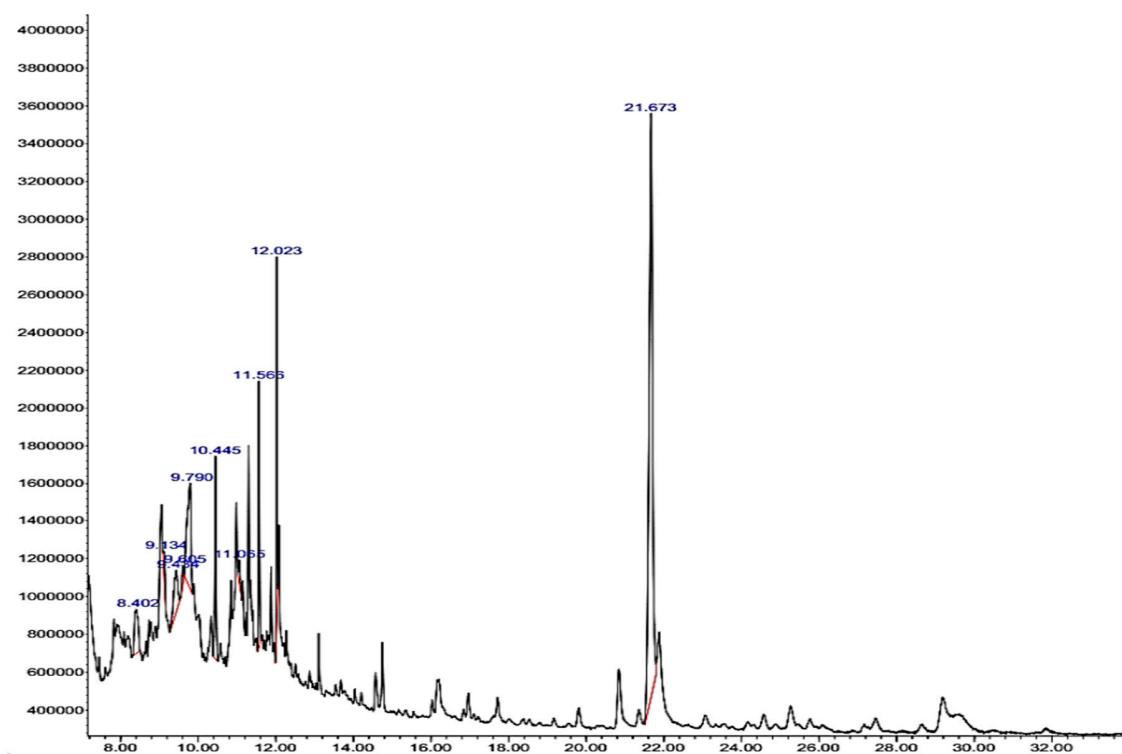

Figure S2. GC-MS chromatogram of the of methanol extract of *A. terreus* AUMC 15762.

**Table S3.** GC–MS spectral analysis of the chemical compounds detected in the methanol extract of *A. terreus* AUMC 15763.

| No. | Retention time (min) | Name of the compound                                | Molecular Weight | Molecular Formula                                             |
|-----|----------------------|-----------------------------------------------------|------------------|---------------------------------------------------------------|
| 1   | 29.191               | 2-Amino propanoic acid                              | 88               | C <sub>3</sub> H <sub>7</sub> NO <sub>2</sub>                 |
| 2   | 11.354               | 3-Isobutylhexahydropyrrolo[1,2-a]pyrazine1,4-dione  | 210              | C <sub>11</sub> H <sub>18</sub> N <sub>2</sub> O <sub>2</sub> |
| 3   | 12.024               | cis, cis-Linoleic acid                              | 266              | C <sub>17</sub> H <sub>30</sub> O <sub>2</sub>                |
| 4   | 20.854               | 4,5,6,7-Tetramethyl-1H-benzimidazole                | 174              | C <sub>11</sub> H <sub>14</sub> N <sub>2</sub>                |
| 5   | 9.116                | N-Ethyl-2-carbomethoxyazetidine                     | 143              | C <sub>7</sub> H <sub>13</sub> NO <sub>2</sub>                |
| 6   | <b>21.709</b>        | <b>Lovastatin</b>                                   | <b>404</b>       | <b>C<sub>24</sub>H<sub>36</sub>O<sub>5</sub></b>              |
| 7   | 11.299               | Palmitic acid                                       | 256              | C <sub>16</sub> H <sub>32</sub> O <sub>2</sub>                |
| 8   | <b>28.687</b>        | <b>Simvastatin</b>                                  | <b>418</b>       | <b>C<sub>25</sub>H<sub>38</sub>O<sub>5</sub></b>              |
| 9   | 10.936               | Sorbitol                                            | 182              | C <sub>6</sub> H <sub>14</sub> O <sub>6</sub>                 |
| 10  | 9.054                | Trans-Crotyl alcohol, tert-butyldimethylsilyl ether | 186              | C <sub>10</sub> H <sub>22</sub> OSi                           |

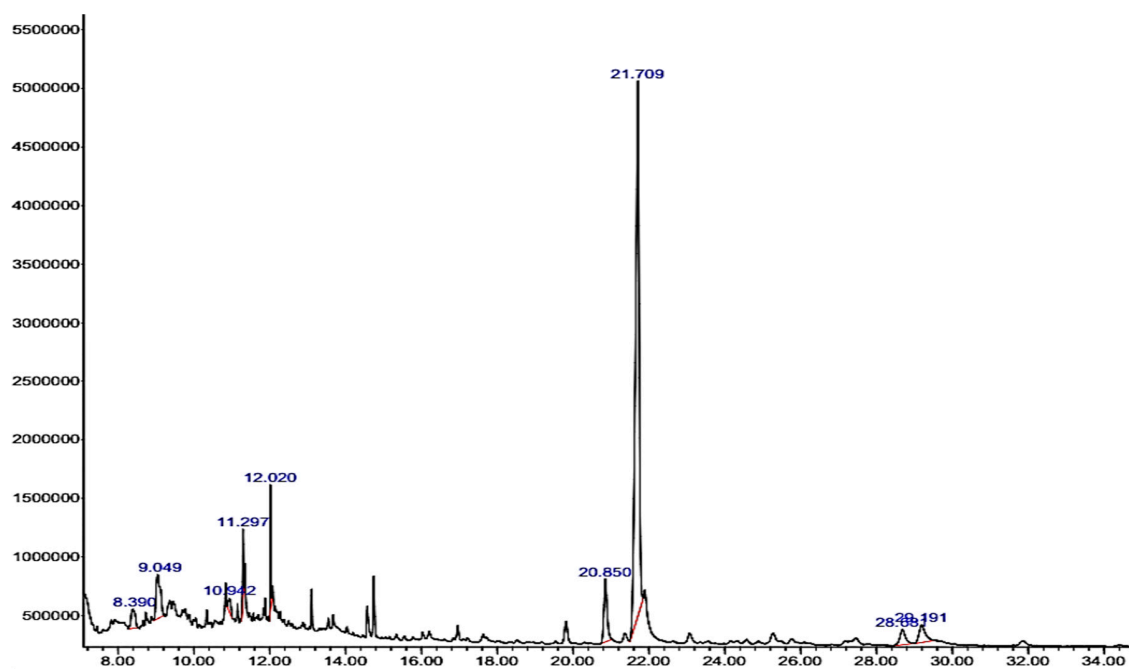

**Figure S3.** GC-MS chromatogram of the of methanol extract of *A. terreus* AUMC 15763.

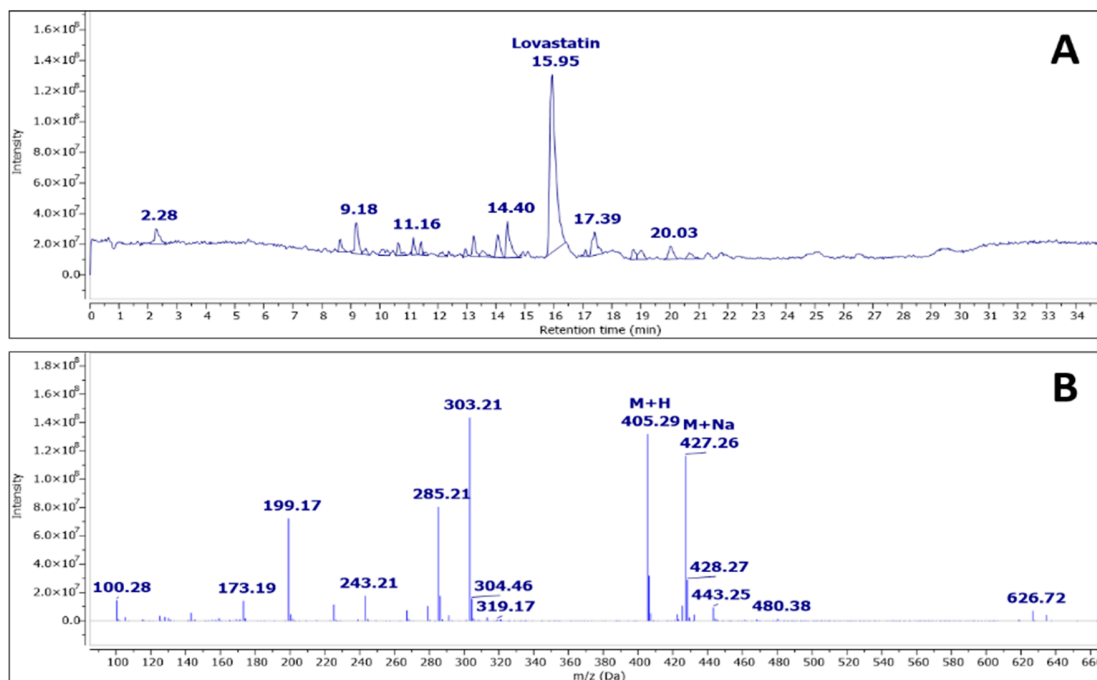

**Figure S4.** (A), LC chromatogram of the fraction Fr. 8-S5. (B), Positive ion LC-MS/MS chromatogram of detected lovastatin in the fraction Fr. 8-S5 produced by *A. terreus* AUMC 15760.

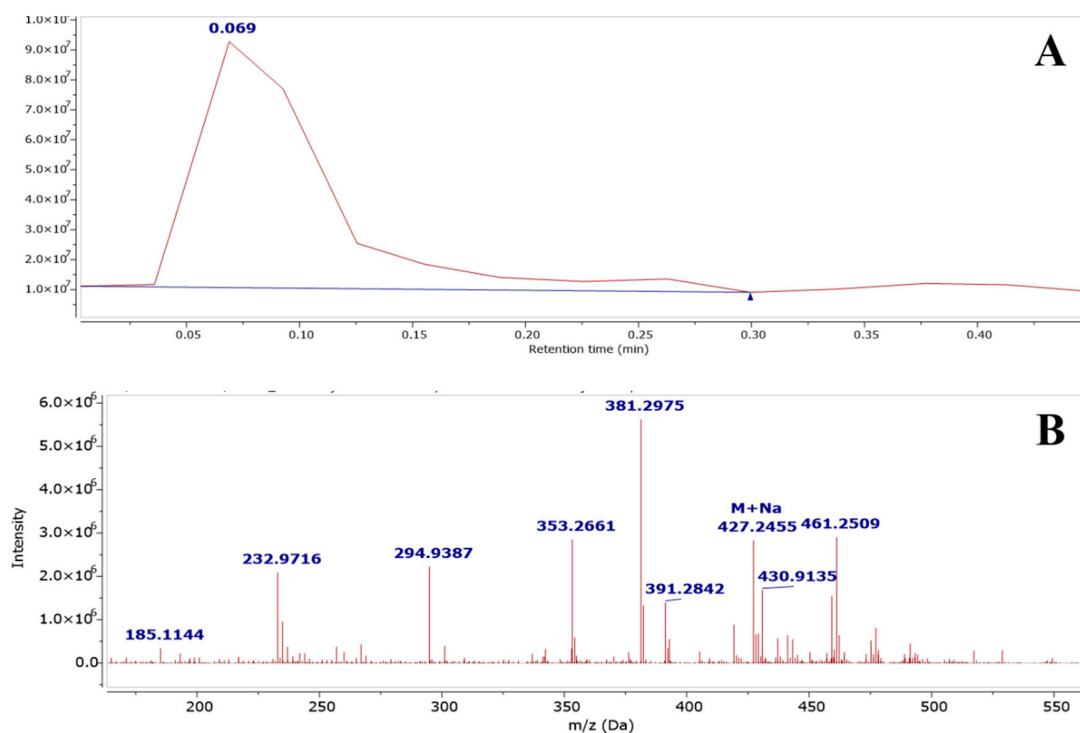

**Figure S5.** (A), Total ion chromatogram. (B), Electron Spray Ionization Mass spectrum of the pure isolated lovastatin.



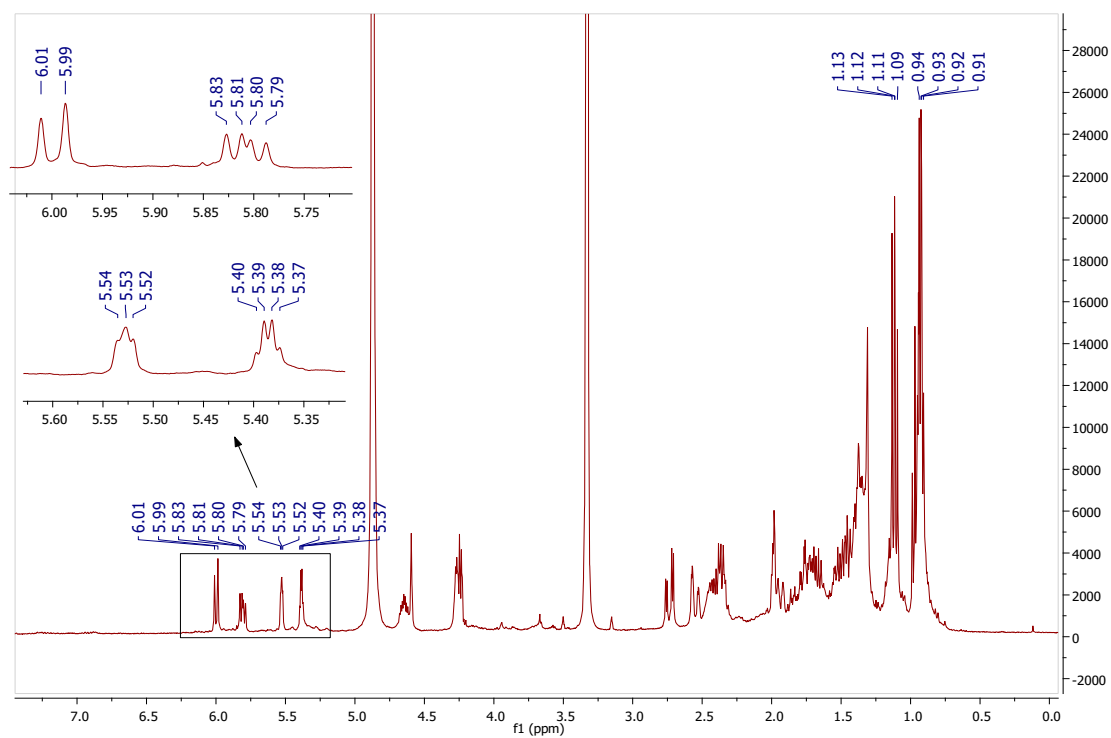

**Figure S6.**  $^1\text{H}$ -NMR spectrum of lovastatin measured in ( $\text{CD}_3\text{OD}$ , 400 MHz).

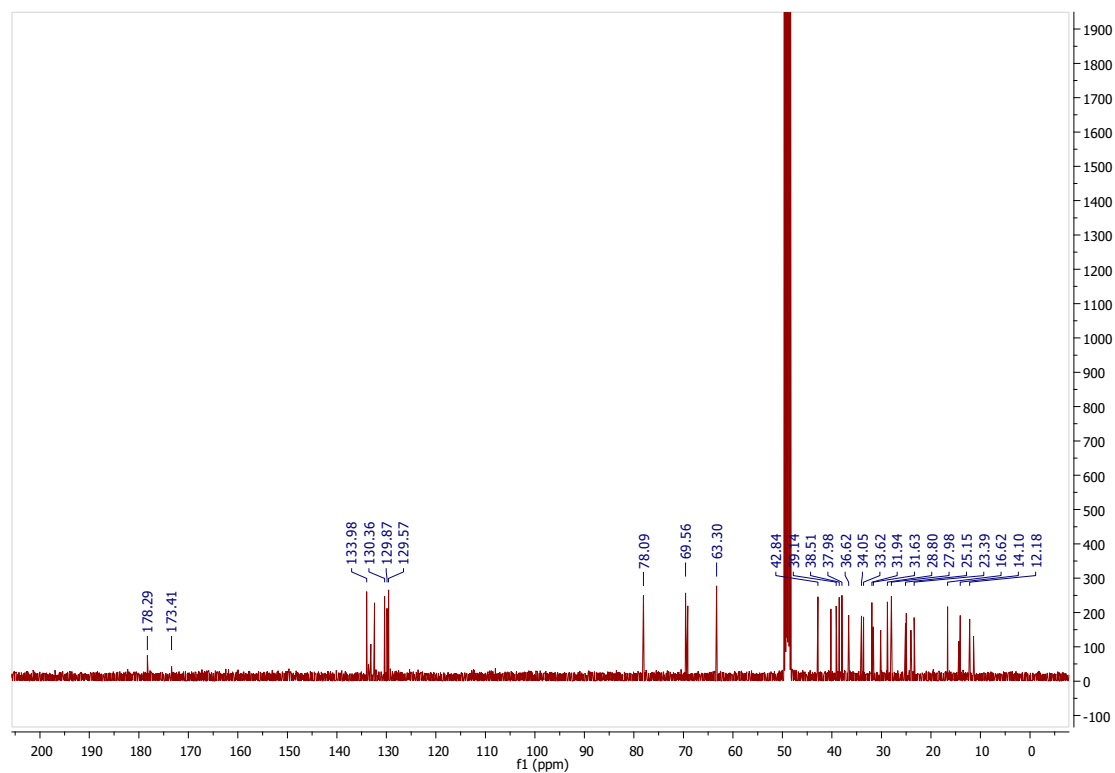

**Figure S7.**  $^{13}\text{C}$ -NMR spectrum of lovastatin measured in ( $\text{CD}_3\text{OD}$ , 100 MHz).

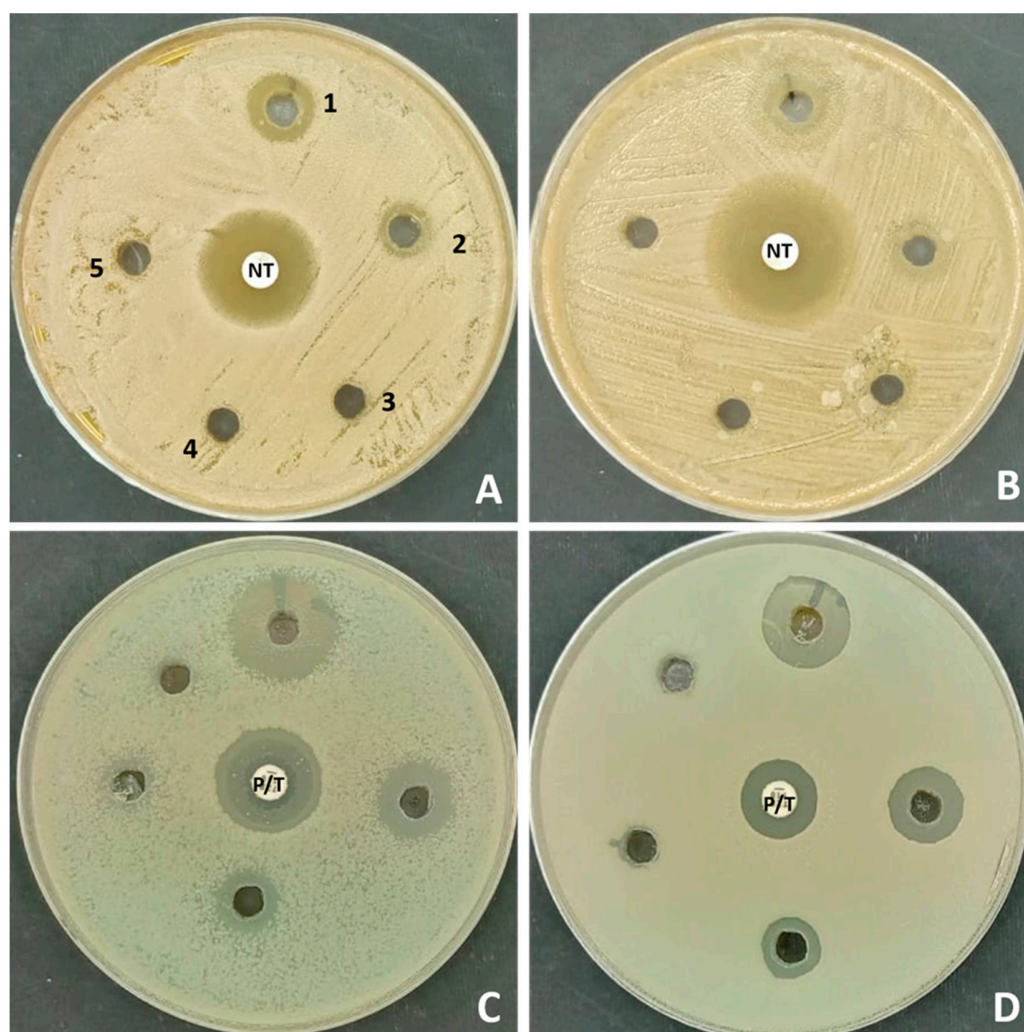

**Figure S8.** Effect of the purified lovastatin on: (A), *C. albicans* (B), *C. glabrata* (C), *S. aureus* (D), *S. epidermidis* (at 1: 5 mg/mL; 2: 2.5 mg/mL; 3: 1.25 mg/mL; 4: 0.62 mg/mL and 5: 0.31 mg/mL) compared to Nystatin (NT) and Piperacillin/Tazobactam (P/T).
